# Supplementary material
Source: Springer Nature journal article supplement (https://www.springermedizin.de/resource/supplementary/12887_2014_1112_MOESM2_ESM.pdf/9476548)

Figure 1: Study I boxplots of parent and family outcomes

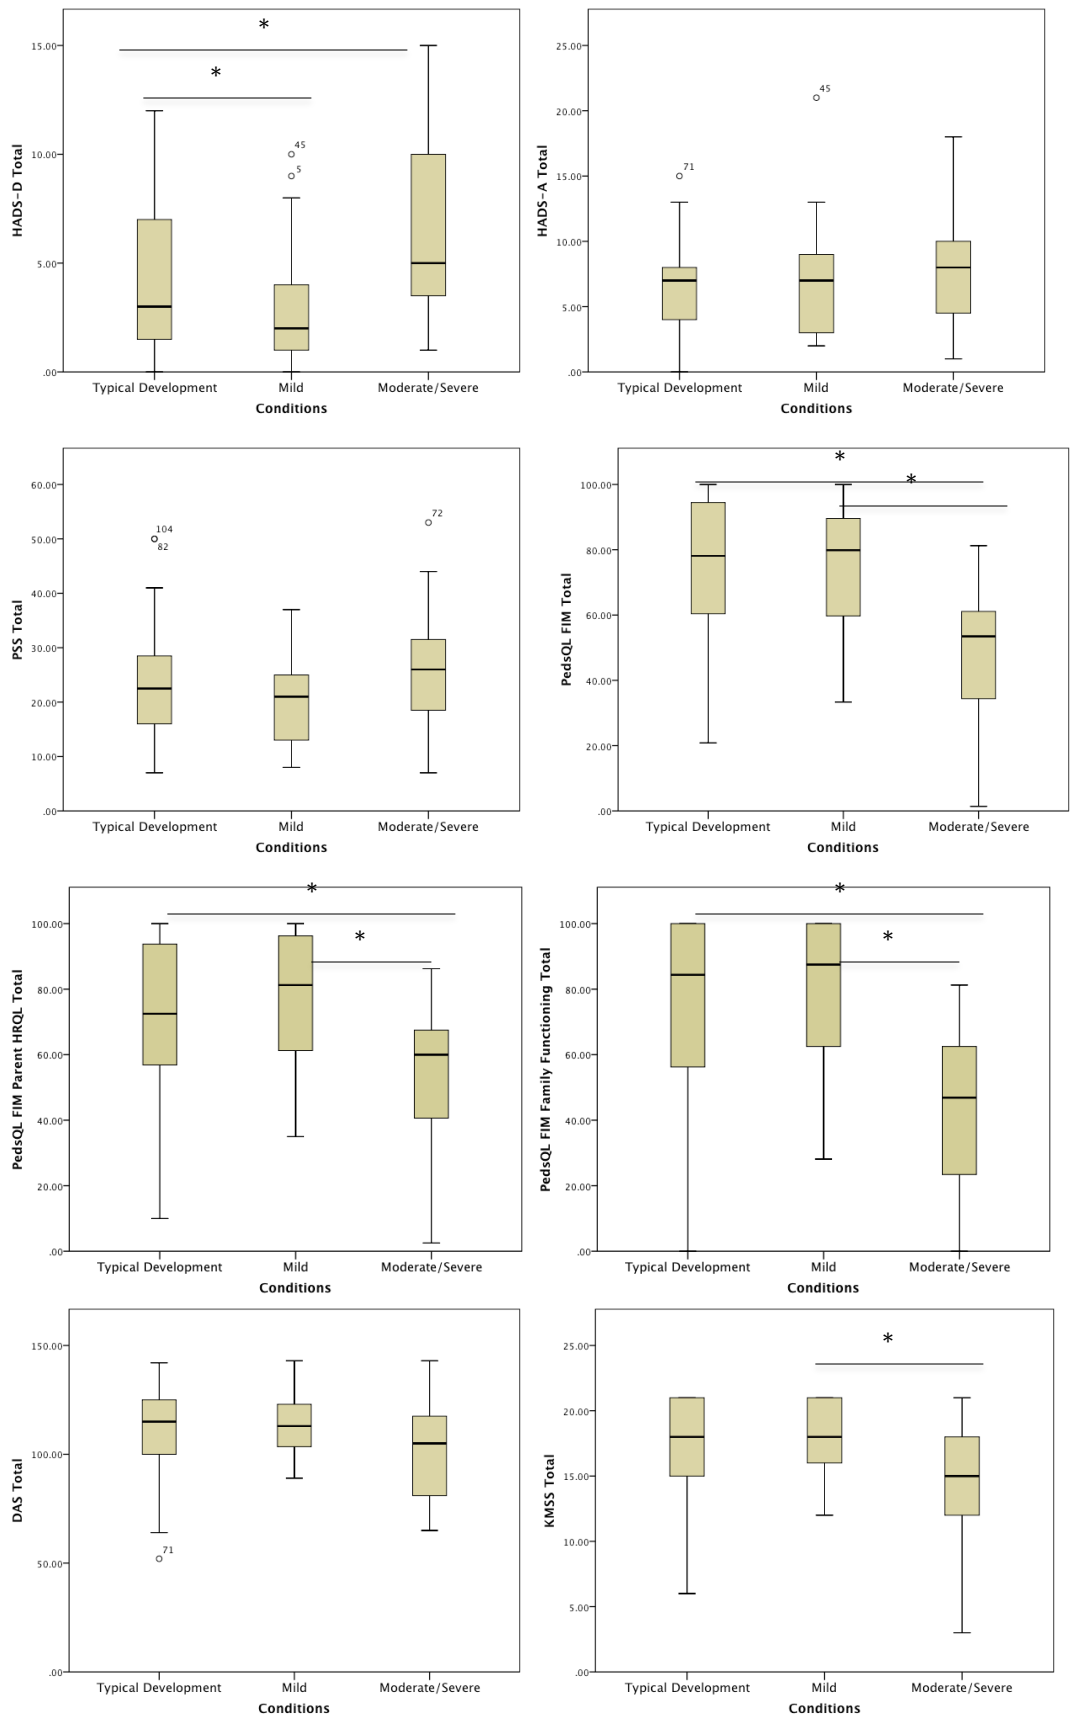

Supplement: MOESM2 [file 9476548]
